# Supplementary material for: Variation of Peripapillary Scleral Shape With Age
Source: PubMed Central journal article supplement — Invest Ophthalmol Vis Sci. 2019 Aug;60(10):3275–82. doi: 10.1167/iovs.19-26777 (PMC6675518; doi:10.1167/iovs.19-26777), 2019-08
Supplement: iovs-60-08-10_s02.pdf [file iovs-60-08-10_s02.pdf]

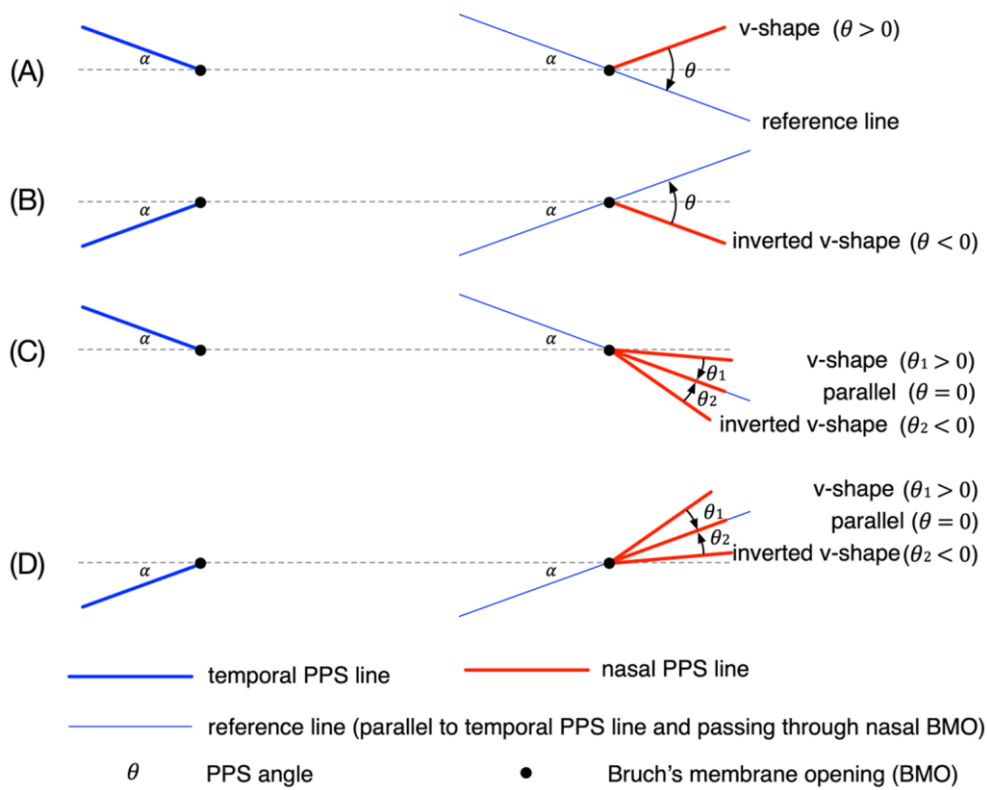

- The magnitude of PPS angle ( $\theta$ ) is between 0 and 90 degrees.
- Taking the nasal PPS line as the initial side and the reference line as terminal side,  $\theta$  is defined as a positive angle if it is clockwise and vice versa.

**Supplementary Figure S2.** Possible configurations of peripapillary sclera shapes with corresponding angles.
