# Supplementary figures and images for: Variation of Peripapillary Scleral Shape With Age
Source: PubMed Central journal article supplement — Invest Ophthalmol Vis Sci. 2019 Aug;60(10):3275–82. doi: 10.1167/iovs.19-26777 (PMC6675518; doi:10.1167/iovs.19-26777), 2019-08

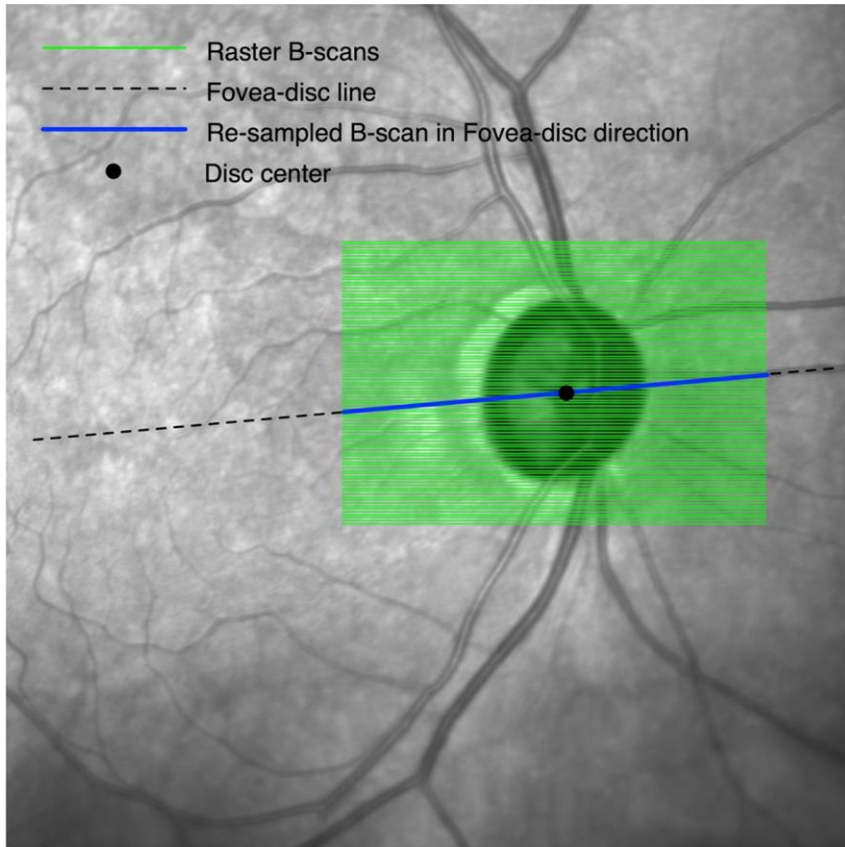

**Supplementary Figure S1.** Location of the resampled fovea-disc B-scan.

Supplement: iovs-60-08-10_s01.pdf [file iovs-60-08-10_s01.pdf]
